# Supplementary material for: Mechanisms Contributing to the Dysregulation of miRNA-124 in Pulmonary Hypertension
Source: PubMed Central journal article supplement (PMC8068139; doi:10.3390/ijms22083852), 2021-04-08
Supplement: ijms-22-03852-s001.pdf [file ijms-22-03852-s001.pdf]

Table S1: Real-time RT-PCR Primer Sequences

| mRNA or pre-miRNA | Forward Primer 5' to 3'        | Reverse Primer 5' to 3' |
|-------------------|--------------------------------|-------------------------|
| Dorsha            | GAGAAGTAACGGTGGAGCTAAG         | GGATATGATGGGTCAGAACAGG  |
| DGCR8             | GAGAACCCAAGTGAGCCTTT           | TAGCTCGGGCAGCTTTATTC    |
| XPO5              | GCGTTTCTTCTCTACCCTCTATG        | TAGCAAGGTCTCCACAGTA     |
| Dicer             | GTCGTGCCGTATTGGTAGTT           | CAGCTCCTCTTGCTCATGTT    |
| TARBP2            | AGGAGTATGGGACCAGAATAGG         | GTGACCCGGAAGGTGAAATTAG  |
| HPRT              | ACGTCTTGCTCGAGATGTGA           | AATCCAGCAGGTCAGCAAAG    |
| 18S               | TGACGGAAGGGCACCACCAG           | GCACCACCACCCACGGAATC    |
| Pre-miR-124-1     | CAGCGGACCTTGATTAAATGTCC        | CAGCCCCATTCTTGGCATTCC   |
| Pre-miR-124-2     | ATCAAGATTAGAGGCTCTGCTC         | AGTGCAGCCGTAGGCTCC      |
| Pre-miR-124-3     | GCGGACCTTGATTAAATGTCT          | TTGGCATTACCCGCGTGCCT    |
| Pre-miR-124-total | CTCCGTGTTACAGCGGACC            | CTTGGCATTACCCGCGTG      |
| <b>MiRNA</b>      | <b>Forward Primer 5' to 3'</b> |                         |
| miR-124           | TAAGGCACGCGGTGAATGC            |                         |
| Let 7i            | CCCCTGAGGTAGTAGTTTGTGCTGTT     |                         |
| miR-224           | CCCTCAAGTCACTAGTGGTTCCGTTTAG   |                         |
| miR-210-3p        | CCCCTGTGCGTGTGACAGCGGCTGA      |                         |
| miR-210-5p        | CCCAGCCCCTGCCCACCGCACACTG      |                         |
| miR-155           | CCCTTAATGCTAATCGTGATAGGGGTT    |                         |
| U6                | CGATACAGAGAAGATTAGCATGGCCC     |                         |

Table S2: gRNA sequence used in Figure 6

|         | target seq           | PAM | Location from TSS | strand |
|---------|----------------------|-----|-------------------|--------|
| sgRNA 1 | AGCCGGGGTAATTAACACGG | GGG | -366              | +      |
| sgRNA 2 | GTGCGTGCGCACTGACAGCG | GGG | -135              | -      |
| sgRNA 3 | TGAGCACCGTGGGTCCGCGA | GGG | 106               | +      |
| sgRNA 4 | GCACTCCGCAATGCGCTCCC | AGG | 391               | -      |
